# Supplementary material for: Expanding the Drosophila toolkit for dual control of gene expression
Source: eLife journal article supplement (doi:10.7554/elife.94073), 2023-12-19

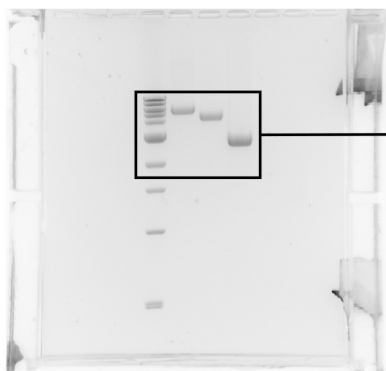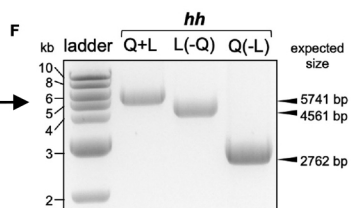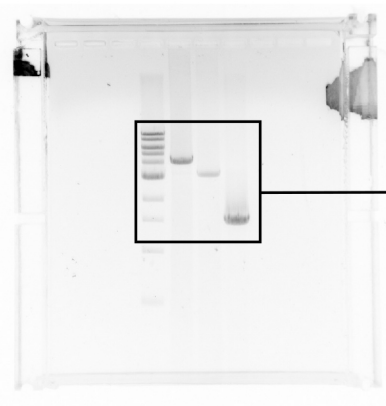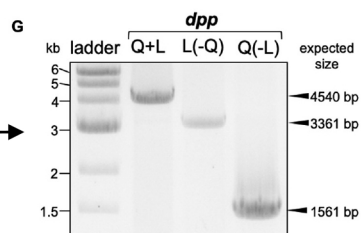

Supplement: fig5-data2 [file elife-94073-fig5-data2-v1.zip]
